# The American Journal of Psychiatry

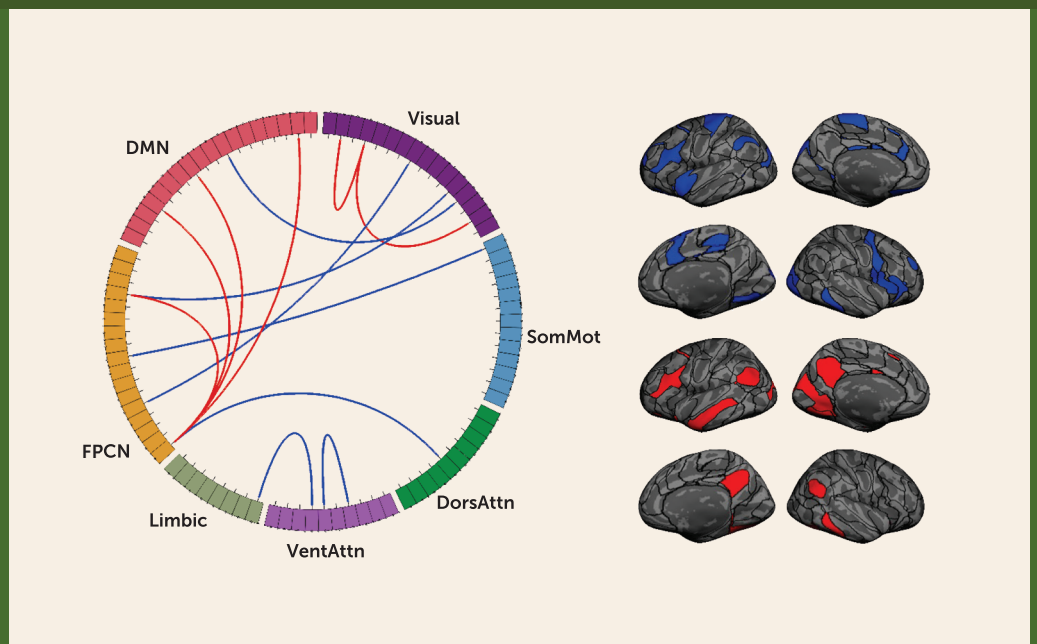

Large-Scale Functional Brain Network Architecture Changes  
Associated With Trauma-Related Dissociation

The Overlapping Neurobiology of Induced  
and Pathological Anxiety

Maternal Psychological Resilience During Pregnancy  
and Newborn Telomere Length

A Randomized Controlled Trial of Repeated Ketamine  
Administration for Chronic Posttraumatic Stress Disorder
