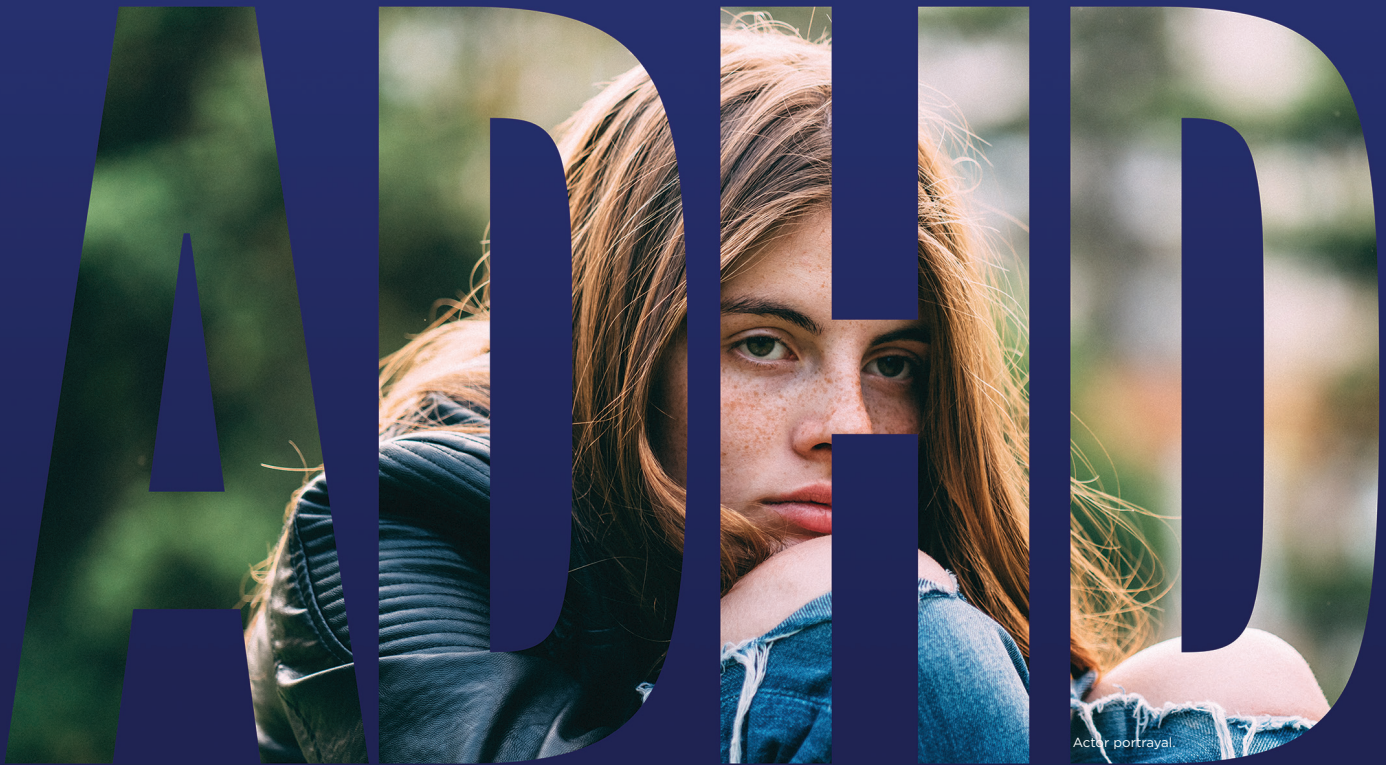

Actor portrayal.

**ANXIETY? DEPRESSION?**

**Her struggles may be tied to complex ADHD.**

**Differential diagnosis is key.**

Our understanding of ADHD has evolved from that of a discrete behavioral condition to a complex neurobiologic disorder with various associated comorbidities.<sup>1-4</sup> It is now recognized that ADHD is usually accompanied by coexisting disorders and other complicating factors that may or may not be identified and adequately treated.<sup>5</sup> Overlapping comorbidities can obscure the many faces of ADHD, potentially standing in the way of effective treatment and successful long-term outcomes.<sup>5</sup>

Visit [TEAM-ADHD.com/DDx](https://TEAM-ADHD.com/DDx) for a deeper dive into complex ADHD and nuances of differential diagnoses.

**REFERENCES:** **1.** Banaschewski T, Becker K, Döpfner M, Holtmann M, Rosler M, Romanos M. Attention deficit/hyperactivity disorder. *Dtsch Arztebl Int.* 2017;114(9):149-159. **2.** Koolwijk I, Stein DS, Chan E, Powell C, Driscoll K, Barbaresi WJ. "Complex" attention-deficit hyperactivity disorder: more norm than exception? Diagnoses and comorbidities in a developmental clinic. *J Dev Behav Pediatr.* 2014;35:591-597. **3.** Brown TE. Developmental complexities of attentional disorders. In: Brown TE, Ed. ADHD Comorbidities. *Handbook for ADHD Complications in Children and Adults*; Arlington, VA: American Psychiatric Publishing Inc; 2009:3-23. **4.** Shaw P, Polanczyk GV. Combining epidemiological and neurobiological perspectives to characterize the lifetime trajectories of ADHD. *Eur Child Adolesc Psychiatry.* 2017;26(2):139-141. **5.** Subcommittee on Attention-Deficit/Hyperactivity Disorder, Steering Committee on Quality Improvement Management, Wolraich M, et al. Clinical Practice Guideline for the Diagnosis, Evaluation, and Treatment of Attention-Deficit/Hyperactivity Disorder in Children and Adolescents. *Pediatrics.* 2019;144(4):e20192528.

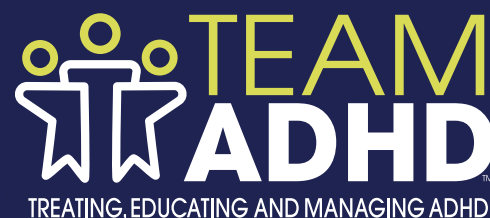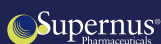

TEAM ADHD is a registered trademark of Supernus Pharmaceuticals, Inc.  
©2020 Supernus Pharmaceuticals, Inc. All rights reserved. SPN.PIP.NB.2020-0271

## Subscription and Business Information

*The American Journal of Psychiatry*, ISSN 0002-953X, is published monthly by the American Psychiatric Association.

The American Psychiatric Association does not hold itself responsible for statements made in its publications by contributors or advertisers. Unless so stated, material in *The American Journal of Psychiatry* does not reflect the endorsement, official attitude, or position of the American Psychiatric Association or of the Journal's Editorial Board.

Periodicals postage paid at Washington, DC, and additional mailing offices. POSTMASTER: Send address changes to *The American Journal of Psychiatry*, Circulation Department, American Psychiatric Association, 800 Maine Avenue, S.W., Suite 900, Washington, D.C. 20024.

### Editorial Office

*American Journal of Psychiatry*  
American Psychiatric Association  
800 Maine Avenue, S.W., Suite 900  
Washington, D.C. 20024  
E-mail: [ajp@psych.org](mailto:ajp@psych.org)

### Customer Service

Phone: (800) 368-5777 (toll-free)  
E-mail: [appi@psych.org](mailto:appi@psych.org)

### APA Member Subscription Services

Phone: (888) 35-PSYCH (toll-free)

### Subscriptions

Regular and resident-fellow members in the U.S. receive print and online access as a **member benefit**. Subscriptions for non-members start at \$362 per year. Online only subscriptions start at \$327 per year. Go to <http://www.appi.org/products> for more information.

Institutional subscriptions are tier priced. For institutional site license or pricing information, contact (202) 559-3729 or [institutions@psych.org](mailto:institutions@psych.org).

*Additional subscription options, including single issues and student rates*  
Contact Customer Service

### Advertising

*Pharmaceutical Print and Online Advertising*  
Frank Cox, Kathleen Harrison, Tim Wolfinger  
Pharmaceutical Media, Inc.  
30 East 33rd Street  
New York, NY 10016  
Phone: (212) 904-0379  
E-mail: [twolfinger@pminy.com](mailto:twolfinger@pminy.com)

*Nonpharmaceutical and Online Sales*  
Eamon Wood  
Pharmaceutical Media, Inc.  
E-mail: [ewood@pminy.com](mailto:ewood@pminy.com)  
(see address and phone above).

### Permissions and Reprints

Material published in the journals of the American Psychiatric Association and American Psychiatric Association Publishing is protected by copyright and all rights are reserved. Material may not be reproduced in any form or by any means without written permission from the copyright owner. For permission to reproduce material published by APA, please visit <http://www.appi.org/customer-service/permissions> for more information. Permission can also be secured through the Copyright Clearance Center ([www.copyright.com](http://www.copyright.com)).

APA does not require that permission be obtained for the photocopying of isolated articles for nonprofit classroom or library reserve use; all fees associated with such permission are waived. This consent does not extend to other kinds of copying, such as copying for general distribution, for advertising or promotional purposes, for creating new collective works, or for resale. Requests for commercial distribution and bulk reprints should be directed to (202) 609-7075.

Indexed in Abstracts for Social Workers, Academic Abstracts, Biological Abstracts, Chemical Abstracts, Chicago Psychoanalytic Literature Index, Cumulative Index to Nursing Literature, Excerpta Medica, Hospital Literature Index, Index Medicus, International Nursing Index, Nutrition Abstracts, Psychological Abstracts, Science Citation Index, Social Science Source, and Social Sciences Index.

Pages are produced by KnowledgeWorks Global (Waterbury, VT) and printed by Sheridan NH (Hanover, NH) on acid-free paper effective with Volume 169, Number 1, January 2012.

© 2021 American Psychiatric Association.

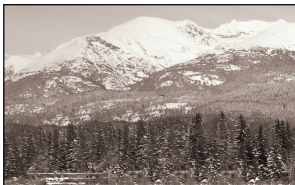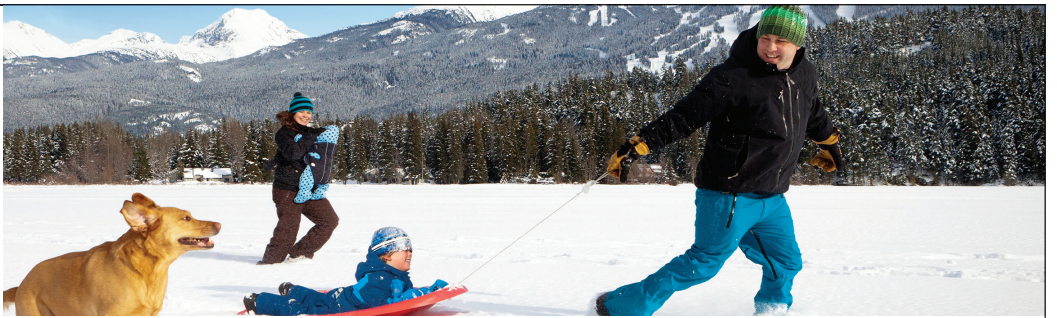

Physician-Led  
Medicine in  
Montana

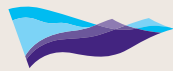

## Billings Clinic

MAYO CLINIC  
CARE NETWORK

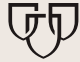

Member

Billings Clinic is nationally recognized for clinical excellence. Billings, Montana is a friendly college community located near the magnificent Rocky Mountains with great schools, safe neighborhoods and abundant family activities. Exciting outdoor recreation is just minutes from home. 300 days of sunshine every year!

BECKER'S  
Hospital Review

**100** Great Hospitals  
in America | 2019

## Psychiatry Outpatient/Inpatient

*Dreaming of the wide, open spaces?*

Seeking BE/BC Adult, Child & Emergency Psychiatrists to join the largest and most comprehensive Psychiatric Center in the Northern Rockies. We are big enough to function as an academic medical center, yet small enough to feel like a caring family.

- **Top tier salary and student loan repayment**
- **Innovative** (emPATH unit, Project ECHO, integrated behavioral health)
- **Physician leadership opportunities**
- **Flexible schedules** (FT, PT, per diem)
- **Opportunity to join faculty & teach** at Montana's only psychiatry residency training program – University of Washington Montana Track
- **Minimal call** with tele-psych support
- **Mayo Clinic Care Network** provides clinical resources & direct access to Mayo Clinic specialists
- **Montana ranked #1 Best State to Work for Doctors** by *Wallethub*

Contact: [physicianrecruiter@billingsclinic.org](mailto:physicianrecruiter@billingsclinic.org)  
[billingsclinic.com](http://billingsclinic.com)

PSYCHIATRIC  
NEWS

BRIEF

## Enable Psychiatric News Brief

With the American Psychiatric Association's new flash briefing, *Psychiatric News Brief*, you can now listen to synopses of curated articles from *Psychiatric News*. Simply enable this skill and you can listen anytime you choose throughout your day by just saying "Alexa, what's my flash briefing" or "Alexa, tell me what's new".

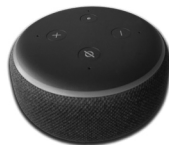

Flash briefing is a customizable Amazon skill that includes updates from your favorite content services. When you say, "Alexa, what's my flash briefing?" or "Alexa, what's the news," you'll hear updates from any organization that you have enabled.

Go to [psychnews.psychiatryonline.org/alexa](http://psychnews.psychiatryonline.org/alexa) to sign up now!

AMERICAN  
PSYCHIATRIC  
ASSOCIATION  
PUBLISHING

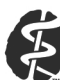

[www.appi.org](http://www.appi.org)  
Email: [appi@psych.org](mailto:appi@psych.org)  
Phone: 1-800-368-5777

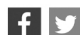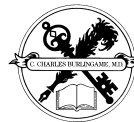

## Call for Nominations

The Institute of Living/Hartford Hospital is pleased to announce that nominations are now being accepted for the 2021 C. Charles Burlingame Award. This award, honoring an outstanding leader in psychiatric education, research or administration, is made in the memory of Dr. Burlingame, psychiatrist-in-chief from 1931 to 1950.

We invite you to nominate a person who has significantly advanced the field of psychiatry. The nomination must include a current curriculum vitae and two letters of support describing the candidate's achievements.

The Institute of Living is a comprehensive behavioral health system for the evaluation and treatment of psychiatric and addiction disorders. We offer a full continuum of services to patients and remain committed to the highest standards of clinical care, research and education.

### Past Recipients

- |                                       |                                   |
|---------------------------------------|-----------------------------------|
| 1988 Robert Kellner, M.D., Ph.D.      | 2005 Herbert D. Kleber, M.D.      |
| 1989 William T. Carpenter, Jr., M.D.  | 2006 Daniel N. Stern, M.D.        |
| 1990 Dennis P. Cantwell, M.D.         | 2007 Jerrold F. Rosenbaum, M.D.   |
| 1991 George E. Vaillant, M.D.         | 2008 K. Ranga Rama Krishnan, M.D. |
| 1992 A. John Rush, M.D.               | 2009 David J. Kupfer, M.D.        |
| 1993 John C. Nemiah, M.D.             | 2010 Professor Sir Michael Rutter |
| 1994 Maurice J. Martin, M.D.          | 2011 Jeffrey A. Lieberman, M.D.   |
| 1995 Otto F. Kernberg, M.D.           | 2012 Judith L. Rapoport, M.D.     |
| 1996 Charles P. O'Brien, M.D., Ph.D.  | 2013 Nora D. Volkow, M.D.         |
| 1997 Glen Owen Gabbard, M.D.          | 2014 Daniel R. Weinberger, M.D.   |
| 1998 Lissy F. Jarvik, M.D., Ph.D.     | 2015 David A. Brent, M.D.         |
| 1999 Nancy C. Andreasen, M.D., Ph.D.  | 2016 Steven S. Sharfstein, M.D.   |
| 2000 Lewis L. Judd, M.D.              | 2017 Harold Alan Pincus, M.D.     |
| 2001 Paul S. Appelbaum, M.D.          | 2018 Kenneth S. Kendler, M.D.     |
| 2002 Charles B. Nemeroff, M.D., Ph.D. | 2019 Max Fink, M.D.               |
| 2003 Dilip V. Jeste, M.D.             | 2020 Ned H. Kalin, M.D.           |
| 2004 David H. Barlow, Ph.D.           |                                   |

Hartford  
HealthCare  
Institute of Living

Nominations should be sent no later than March 19, 2021 to:  
Harold Schwartz, MD  
Psychiatrist-in-Chief Emeritus  
The Institute of Living/Hartford Hospital  
200 Retreat Ave., Hartford, CT 06106  
or e-mail to [Blair.Elliott@hhchealth.org](mailto:Blair.Elliott@hhchealth.org)



# THE AMERICAN PSYCHIATRIC ASSOCIATION

800 Maine Avenue, S.W., Suite 900, Washington, D.C. 20024

(888) 357-7924 (toll-free inside the U.S. and Canada)

web site: [www.psychiatry.org](http://www.psychiatry.org) • e-mail: [apa@psych.org](mailto:apa@psych.org)

## Chairpersons of Councils, Committees, and Task Forces

### Standing Committees

|                             |                                   |
|-----------------------------|-----------------------------------|
| <b>Bylaws</b>               | Kimberly D. Nordstrom, M.D., J.D. |
| <b>Elections</b>            | Justin W. Schoen, M.D.            |
| <b>Ethics</b>               | Rebecca W. Brendel, M.D., J.D.    |
| <b>Finance and Budget</b>   | Ann T. Sullivan, M.D.             |
| <i>Audit</i>                | Ayana Jordan, M.D., Ph.D.         |
| <i>Investment Oversight</i> | Steven S. Sharfstein, M.D.        |
| <b>Joint Reference</b>      | Vivian Pender, M.D.               |
| <b>Membership</b>           | Eric R. Williams, M.D.            |
| <b>Nominating</b>           | Bruce J. Schwartz, M.D.           |
| <b>Tellers</b>              | John A. Talbott, M.D.             |

### Non-Standing Committee

|                             |                               |
|-----------------------------|-------------------------------|
| <b>Conflict of Interest</b> | Sandra M. DeJong, M.D., M.Sc. |
|-----------------------------|-------------------------------|

### Councils

#### Council on Addiction Psychiatry

Jill Williams, M.D.

#### Council on Advocacy and Government Relations

Katherine G. Kennedy, M.D.

*Advocacy and Litigation Funding*

Bhasker J. Dave, M.D.

#### Council on Children, Adolescents, and Their Families

Gabrielle Shapiro, M.D.

*Women's Mental Health*

Ludmila B. De Faria, M.D.

#### Council on Communications

Isabel K. Norian, M.D.

#### Council on Consultation-Liaison Psychiatry

Sejal B. Shah, M.D.

#### Council on Geriatric Psychiatry

Robert P. Roca, M.D.

#### Council on Healthcare Systems and Financing

Robert L. Trestman, M.D., Ph.D.

*Integrated Care*

Henry Chung, M.D.

*RBRVS, Codes and Reimbursement*

Gregory G. Harris, M.D.

*Reimbursement for Psychiatric Care*

Laurence H. Miller, M.D.

*Telepsychiatry*

James H. Shore, M.D.

#### Council on International Psychiatry and Global Health

David C. Henderson, M.D.

*Chester Pierce Human Rights Award Committee*

[Pending]

#### Council on Medical Education and Lifelong Learning

Eindra Khin Khin, M.D.

*Innovation*

Nina Vasani, M.D.

*Scientific Program*

Jacqueline M. Feldman, M.D.

*Scientific Program-IPS (Oct. to Oct. tenure)*

[Pending]

*Vestermark Award Committee*

Joseph A. Cheong, M.D.

*Well-being and Burnout*

Batool Kazim, M.D.

#### Council on Minority Mental Health and Health Disparities

Eric Yarbrough, M.D.

#### Council on Psychiatry and Law

Debra A. Pinals, M.D.

*Judicial Action*

Reena Kapoor, M.D.

#### Council on Quality Care

Grayson S. Norquist, M.D.

*Mental Health Information Technology*

John Torous, M.D.

*Quality and Performance Measurement*

Carol Alter, M.D.

*Practice Guidelines*

Daniel J. Anzia, M.D.

#### Council on Research

Jonathan E. Alpert, M.D., Ph.D.

*Psychiatric Dimensions of Disasters*

Joshua C. Morganstein, M.D.



Searching for  
the perfect  
psychiatric  
career?

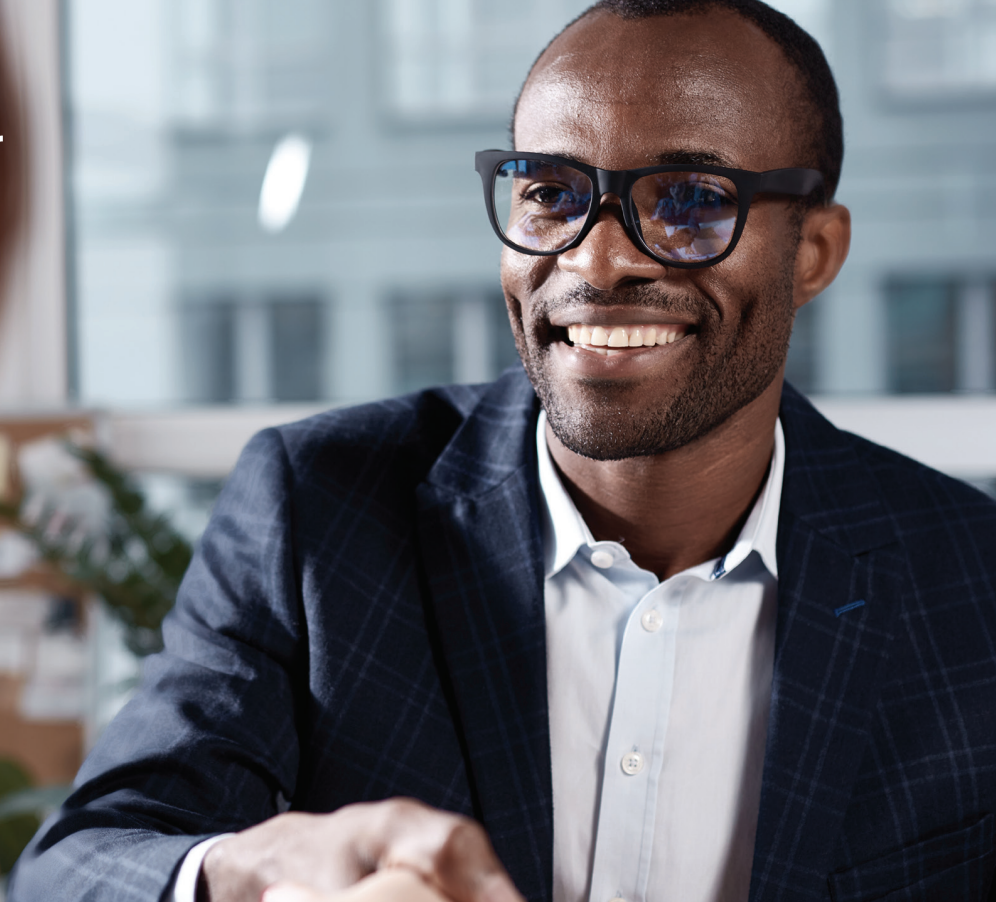

## Let APA JobCentral help!

### Manage Your Career

- Browse hundreds of active job listings!
- Create an account to save jobs, store multiple resumes and cover letters and communicate with employers through our internal messaging system.
- Set up multiple job alerts specifying your skills, interests and location to receive e-mails when employers post jobs that match your criteria.

### Recruit for Open Positions

- Post your job in front of thousands of highly qualified psychiatrists.
- Cross promote your job listing in Psychiatric News.
- Search the anonymous resume database to find your ideal candidate.

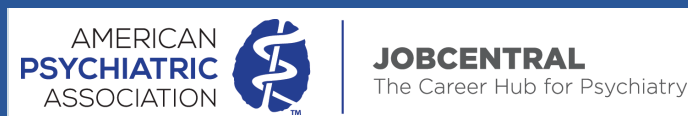

[jobs.psychiatry.org](https://jobs.psychiatry.org)

# Behavioral and Mental Health

## Children's and Emory University accepting applications

Children's Healthcare of Atlanta and Emory University School of Medicine are seeking a visionary and collaborative leader with a strong clinical and academic foundation to serve as Chief of Behavioral and Mental Health at Children's and as Academic Division Chief of Behavioral and Mental Health in the Emory University Department of Pediatrics

In these roles, the selected candidate will oversee management of behavioral and mental health services, be responsible for implementing and overseeing a culture of excellence, and identify and lead opportunities for community partnerships and engagement. The selected candidate will also help support the advancement of research and teaching excellence.

### Certification summary

- Doctor of Medicine (MD/DO) from an accredited school of medicine or Doctor of Psychology (PhD or PsyD)
  - MD/DO candidates—board-certification in child psychiatry and eligibility for licensure in Georgia required
  - PhD/PsyD candidates—completion of an APA-accredited internship, completion of post-doctoral fellowship in a pediatric specialty and eligibility for licensure in Georgia required
- Eligible for appointment at associate professor or professor level at Emory University
- Meet eligibility requirements for credentialing as part of the Children's professional staff

To apply, contact: Mark Lotz, Director | Executive and Physician Recruiting | Children's Healthcare of Atlanta | [mark.lotz@choa.org](mailto:mark.lotz@choa.org)

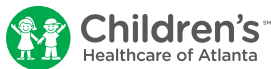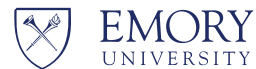

*Children's and Emory University are equal opportunity employers and committed to providing environments that support a diverse and inclusive workforce.*

## Are you a provider treating Veterans with PTSD?

## We can help

### WE OFFER FREE

- Expert Consultation
- Continuing Education
- Assessment and Screening Tools
- PTSD Resources

### CONTACT US

- Available by email or phone
- Responses are quick
- Calls are scheduled at your convenience

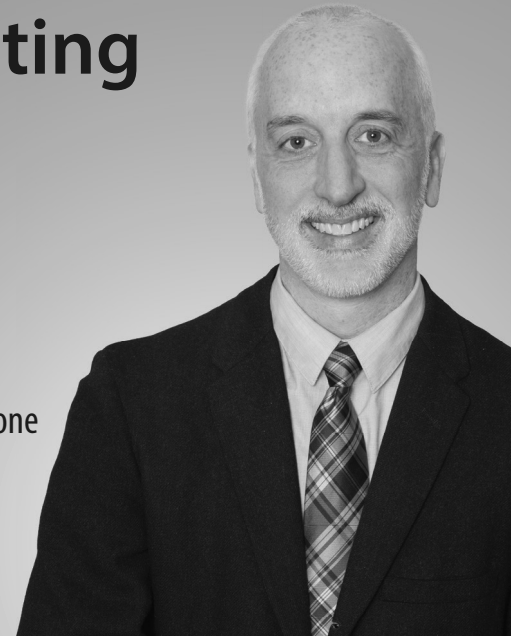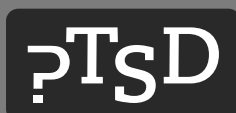

PTSD  
Consultation  
Program

FOR PROVIDERS WHO TREAT VETERANS

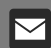

[PTSDconsult@va.gov](mailto:PTSDconsult@va.gov)

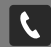

866-948-7880

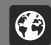

[www.ptsd.va.gov/consult](http://www.ptsd.va.gov/consult)

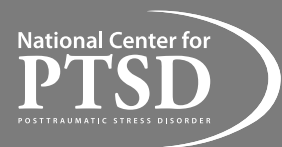

**ASK US ABOUT:** Online training in the Clinician-Administered PTSD Scale (CAPS-5), the gold standard for PTSD assessment

# The American Psychiatric Association Publishing Textbook of Substance Use Disorder Treatment, Sixth Edition

Edited by Kathleen T. Brady, M.D., Ph.D., Frances R. Levin, M.D.,  
Marc Galanter, M.D., and Herbert D. Kleber, M.D.

Coming  
February 2021!

A robust revision, including many entirely new chapters addressing policy, the latest treatment approaches, and special topics, the Sixth Edition of *The APA Publishing Textbook of Substance Use Disorder Treatment* offers a comprehensive and compelling review of this ever-evolving field. New sections address important topics that have gained prominence or become the focus of increased research attention since the Fifth Edition was released. For example, substance use and other psychiatric disorders often co-occur, and the resulting dual disorder is frequently associated with greater symptom severity and worse long-term prognosis than either disorder alone. Accordingly, the section on psychiatric comorbidity covers the epidemiology, assessment, and treatment of substance use disorders (SUDs) that co-occur with psychotic, mood, anxiety, eating, attention-deficit/hyperactivity, or trauma-related disorders.

The section devoted to special populations has been revamped, and the topics have been thoroughly updated, some now covered by new contributors and others completely new to this edition. SUDs among women (including perinatal issues), adolescents, patients with chronic pain, sexual and gender minority populations, and older adults are addressed in detailed chapters, as are behavioral addictive disorders and cross-cultural aspects of substance-related and addictive disorders.

Finally, the editors have included a section devoted to critically important topics in public health, including the U.S. opioid epidemic, cannabis policy and use, HIV/AIDS and hepatitis C, nicotine and public health, and the prevention of SUDs.

Evidence-based, down to earth, and meticulously edited, the new Sixth Edition of *The APA Publishing Textbook of Substance Use Disorder Treatment* is an essential resource for clinicians who treat SUDs in a variety of settings—from examining rooms to emergency departments, and from hospitals to recovery facilities.

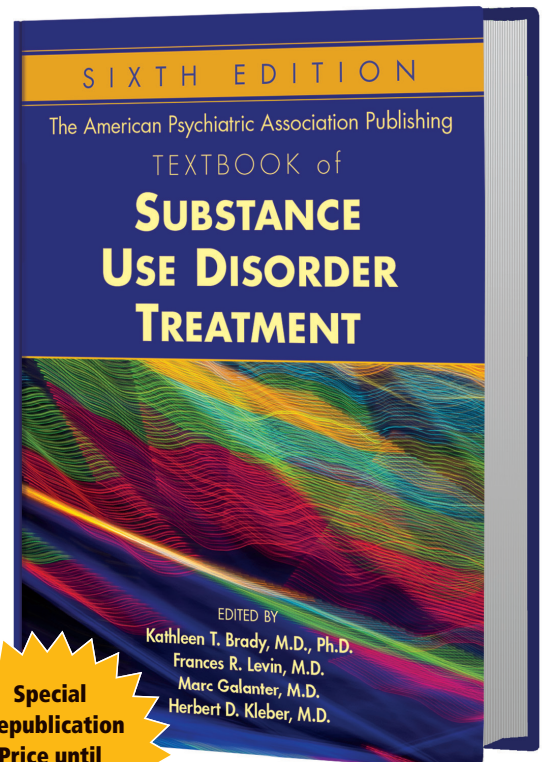

Special  
Prepublication  
Price until  
February 28, 2021

2021 • 960 pages • ISBN 978-1-61537-221-8 • Hardcover • Special Prepublication Price of \$183.00 until February 28, 2021 (thereafter \$215.00) • Item #37221

2021 • 960 pages • ISBN 978-1-61537-353-6 • eBook • \$175.00 • Item #37353

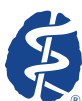



# Go Online

Visit [ajp.psychiatryonline.org](http://ajp.psychiatryonline.org) for these features!

**AJP in Advance** *Discover the latest research advances before they appear in print*

## Psychotherapy at a Distance

The Covid-19 pandemic has changed everything, including the practice of psychotherapy. This review describes the relatively small research base for remote treatment and the practical and emotional changes its practice entails.

**AJP CME** *Earn CME credit: 3 courses per issue*

You can earn CME credits by reading articles in *The American Journal of Psychiatry*. Three articles in this issue form a short course that consists of reading the article and answering three multiple-choice questions with a single correct answer for up to 1 *AMA PRA Category 1 Credit™* each. Credit is issued only to subscribers of the online AJP CME Course Program.

See the table below for the articles in this month's issue that are the subject of a CME quiz.

**AJP Multimedia** *Access audio and video for highlights of each issue*

In **AJP Audio** each month, Executive Editor Michael Roy speaks with the author(s) of an article about the results of their research. In addition, Deputy Editor Daniel S. Pine, M.D., summarizes one or two articles in an **Issue Highlights** video. The table below lists the articles included in this month's audio podcast and video.

| In this issue                                                                                                              | CME | Podcast | Video |
|----------------------------------------------------------------------------------------------------------------------------|-----|---------|-------|
| The Overlapping Neurobiology of Induced and Pathological Anxiety: A Meta-Analysis of Functional Neural Activation (p. 156) | ✓   |         |       |
| Large-Scale Functional Brain Network Architecture Changes Associated With Trauma-Related Dissociation (p. 165)             | ✓   |         |       |
| Pervasively Thinner Neocortex as a Transdiagnostic Feature of General Psychopathology (p. 174)                             |     |         | ✓     |
| Maternal Psychological Resilience During Pregnancy and Newborn Telomere Length: A Prospective Study (p. 183)               | ✓   | ✓       |       |
| A Randomized Controlled Trial of Repeated Ketamine Administration for Chronic Posttraumatic Stress Disorder (p. 193)       |     |         | ✓     |

**History of Psychiatry** *Revisit the field's rich history through the AJP Archive*

## 50 Years Ago This Month: The Psychiatrist and Medical Home Care: Geriatric Psychiatry in the Harlem Community

The author describes his experience as a psychiatric consultant to a medical home care program dealing largely with geriatric patients. His participation in the program included psychiatric evaluations in the patients' homes, case consultations, and staff education. The author also points out some of the additional possibilities for the further involvement of psychiatrists in such programs.

@APAPubJournals

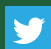

Psychiatry Online

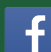

AMERICAN  
PSYCHIATRIC  
ASSOCIATION  
PUBLISHING

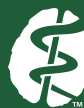

[www.appi.org](http://www.appi.org)  
1-800-368-5777  
[appi@psych.org](mailto:appi@psych.org)

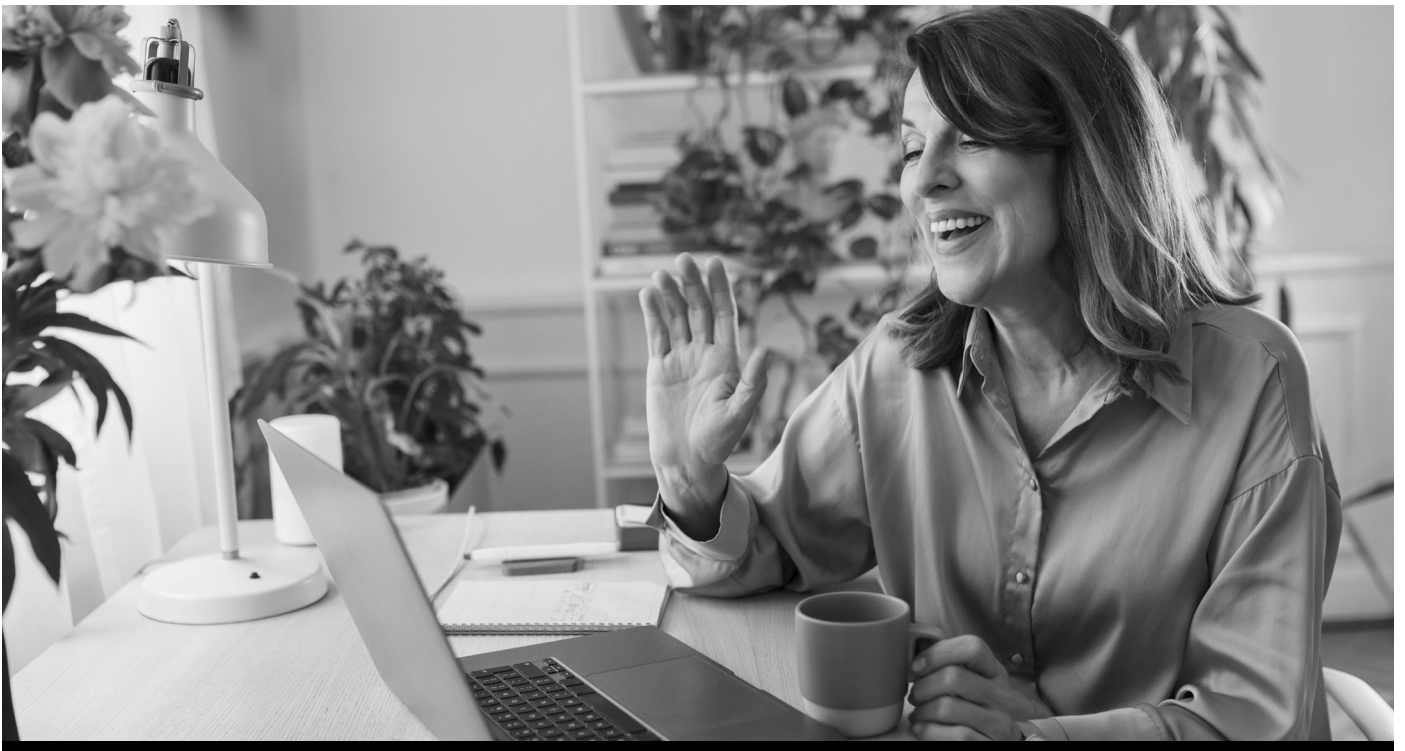

# We've Got You Covered

## American Psychiatric Association Endorsed Professional Liability Insurance Program

Designed for Psychiatrists in all practice settings

**DID YOU KNOW? We find that our policyholders are more likely to receive a board complaint than be named in a claim or lawsuit.**

Most insurance policies provided by employers do not include reimbursement for costs incurred to defend a complaint (or have limits that may be shared with others).

Not to worry... we include up to \$50,000 of defense reimbursement – with the option to increase this limit to \$150,000.

What's more, coverage for **Telepsychiatry** is provided, subject to the terms and conditions of the policy.

Cyber Coverage is available as an endorsement at renewal or on a new American Professional Agency policy. Available in most states on an admitted basis.

*(All discounts, coverage features and rating are subject to individual state approval.)*

Visit us at [apamalpractice.com](http://apamalpractice.com) or call **877-740-1777** to learn more.

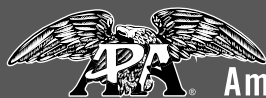

**American Professional Agency**

LEADERS IN PSYCHIATRIC MEDICAL LIABILITY INSURANCE

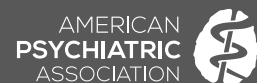

Source: https://psychiatryonline.org/doi/suppl/10.1176/ajp.2021.178.issue-2/suppl_file/front.pdf
